# Supplementary material for: Machine learning models accelerate deep eutectic solvent discovery for the recycling of lithium-ion battery cathodes
Source: Royal Society of Chemistry journal article supplement (doi:10.1039/d4gc01418a), 2024-01-01
Supplement: d4gc01418a1.pdf [file d4gc01418a1.pdf]

## Supporting Information

### Machine learning models accelerate deep eutectic solvents discovery for the recycling of Lithium-ion battery cathodes

Fengyi Zhou,<sup>‡,a</sup> Dingyi Shi,<sup>‡,b</sup> Wenbo Mu,<sup>c</sup> Shao Wang,<sup>a</sup> Zeyu Wang,<sup>a</sup> Chenyang Wei,<sup>a</sup> Ruiqi Li,<sup>\*,b</sup> Tiancheng Mu<sup>\*,a</sup>

<sup>a</sup> Department of Chemistry, Renmin University of China, Beijing 100872, China.

<sup>b</sup> College of Information Science and Technology, Beijing University of Chemical Technology, Beijing 100029, China.

<sup>c</sup> Department of Computer Science and Engineering, University of California San Diego, La Jolla, CA, 92093-0404, USA.

Department of Chemistry, Renmin University of China, Beijing 100872, China. Email: [zhoufengyi@ruc.edu.cn](mailto:zhoufengyi@ruc.edu.cn)

College of Information Science and Technology, Beijing University of Chemical Technology, Beijing 100029, China. Email: [sdy@buct.edu.cn](mailto:sdy@buct.edu.cn)

Department of Computer Science and Engineering, University of California San Diego, La Jolla, CA, 92093-0404, USA. Email: [wmu@ucsd.edu](mailto:wmu@ucsd.edu) (WM)

Department of Chemistry, Renmin University of China, Beijing 100872, China. Email: [wangzeyu@ruc.edu.cn](mailto:wangzeyu@ruc.edu.cn)

Department of Chemistry, Renmin University of China, Beijing 100872, China. Email: [wangshao@ruc.edu.cn](mailto:wangshao@ruc.edu.cn)

College of Information Science and Technology, Beijing University of Chemical Technology, Beijing 100029, China. Email: [lir@buct.edu.cn](mailto:lir@buct.edu.cn) (RL)

Department of Chemistry, Renmin University of China, Beijing 100872, China. Email: [tcmu@ruc.edu.cn](mailto:tcmu@ruc.edu.cn) (TM)

‡These authors contributed equally.

**Table S1** Electrochemical data of DESs in LCO dataset.

| DES                                             | ratio   | $E_m$  | $E_{re}$ | E      |
|-------------------------------------------------|---------|--------|----------|--------|
| ChCl : Glycol                                   | 1:1     | 0.41   | 0.365    | 0.045  |
| ChCl : Glycol                                   | 1:1.5   | 0.39   | 0.32     | 0.070  |
| ChCl : Glycol                                   | 1:2     | 0.36   | 0.355    | 0.005  |
| ChCl : Glycol                                   | 1:4     | 0.28   | 0.35     | -0.070 |
| ChCl : Ethylene glycol                          | 1:2     | 0.29   | 0.34     | -0.050 |
| ChCl : Ethylene glycol                          | 1:3     | 0.27   | 0.34     | -0.070 |
| ChCl : Ethylene glycol                          | 1:4     | 0.2    | 0.335    | -0.135 |
| ChCl : Urea                                     | 1:2     | 0.15   | 0.325    | -0.175 |
| ChCl : Oxalic acid                              | 1:1     | 0.95   | 0.355    | 0.595  |
| PTSA·H <sub>2</sub> O:ChCl                      | 1:1     | 1.02   | 0.37     | 0.650  |
| PTSA·H <sub>2</sub> O:ChCl:H <sub>2</sub> O     | 1:1:1   | 0.99   | 0.35     | 0.640  |
| PTSA·H <sub>2</sub> O:ChCl:H <sub>2</sub> O     | 1:1:2   | 0.98   | 0.33     | 0.650  |
| ChCl : L-ascorbic acid : H <sub>2</sub> O       | 2:1:0   | 0.18   | 0.325    | -0.145 |
| ChCl : : L-ascorbic acid : H <sub>2</sub> O     | 2:1:2   | -0.07  | 0.285    | -0.355 |
| ChCl : : L-ascorbic acid : H <sub>2</sub> O     | 2:1:4   | -0.076 | 0.25     | -0.326 |
| ChCl : : L-ascorbic acid : H <sub>2</sub> O     | 2:1:6   | -0.11  | 0.215    | -0.325 |
| ChCl : PTSA ( $\rho$ -toluenesulfonic acid)     | 1:1     | 1.02   | 0.31     | 0.710  |
| ChCl : Malonic acid                             | 1:1     | 0.87   | 0.36     | 0.510  |
| ChCl : Formic acid                              | 1:2     | 0.78   | 0.275    | 0.505  |
| ChCl : acetic acid                              | 1:2     | 0.64   | 0.345    | 0.295  |
| ChCl : propionic acid                           | 1:2     | 0.63   | 0.365    | 0.265  |
| ChCl : n-butyric acid                           | 1:2     | 0.48   | 0.375    | 0.105  |
| ChCl : Formic acid : H <sub>2</sub> O           | 1:2:1.4 | 0.88   | 0.285    | 0.595  |
| ChCl : Formic acid : H <sub>2</sub> O           | 1:2:3.2 | 0.87   | 0.255    | 0.615  |
| ChCl : Formic acid : H <sub>2</sub> O           | 1:2:5.5 | 0.81   | 0.235    | 0.575  |
| ChCl : Formic acid : H <sub>2</sub> O           | 1:2:8.6 | 0.685  | 0.215    | 0.470  |
| ChCl : L-(+)-tartaric acid:H <sub>2</sub> O     | 1:1:1.1 | 0.87   | 0.27     | 0.600  |
| ChCl : L-(+)-tartaric acid:H <sub>2</sub> O     | 1:1:0   | 0.88   | 0.33     | 0.550  |
| ChCl : L-(+)-tartaric acid:H <sub>2</sub> O     | 1:1:2.2 | 0.86   | 0.25     | 0.610  |
| ChCl : L-(+)-tartaric acid:H <sub>2</sub> O     | 1:1:3.3 | 0.86   | 0.24     | 0.620  |
| ChCl : succinic acid : EG                       | 1:1:1   | 0.76   | 0.315    | 0.445  |
| Guanidine hydrochloride : lactic acid           | 1:2     | 0.87   | 0.265    | 0.605  |
| Ethylene glycol : sulfosalicylic acid dihydrate | 8:1     | 0.85   | 0.32     | 0.530  |
| Ethylene glycol : sulfosalicylic acid dihydrate | 12:1    | 0.83   | 0.335    | 0.495  |
| Ethylene glycol : sulfosalicylic acid dihydrate | 10:1    | 0.83   | 0.33     | 0.500  |
| Ethylene glycol : monohydrate citric acid       | 1:1     | 0.645  | 0.245    | 0.400  |
| Ethylene glycol : monohydrate citric acid       | 1.5:1   | 0.64   | 0.23     | 0.410  |
| Ethylene glycol : monohydrate citric acid       | 2:1     | 0.57   | 0.235    | 0.335  |
| Ethylene glycol : monohydrate citric acid       | 2.5:1   | 0.57   | 0.22     | 0.350  |
| Ethylene glycol : monohydrate citric acid       | 3:1     | 0.51   | 0.245    | 0.265  |
| Ethylene glycol : monohydrate citric acid       | 3.5:1   | 0.49   | 0.245    | 0.245  |
| PEG200 : PTSA·H <sub>2</sub> O                  | 1:1     | 1.031  | 0.28     | 0.751  |

$E = E_m - E_{re}$ ,  $E_m$  is the measured potential in DES,  $E_{re}$  is the potential of internal reference.

**Table S2** Electrochemical data of DESs in DES dataset.

| DES                                                  | ratio | $E_m$ | $E_{re}$ | E      |
|------------------------------------------------------|-------|-------|----------|--------|
| ChCl : Glutaric acid                                 | 1:1   | 0.78  | 0.315    | 0.465  |
| ChCl : 1,2-Propanediol                               | 1:2   | 0.38  | 0.395    | -0.015 |
| ChCl : 1,2-Propanediol                               | 1:3   | 0.18  | 0.400    | -0.220 |
| ChCl : 1,2-Propanediol                               | 1:4   | 0.20  | 0.400    | -0.200 |
| ChCl : 1,2-Propanediol                               | 1:5   | 0.23  | 0.400    | -0.170 |
| ChCl : 1,2-Propanediol                               | 1:6   | 0.32  | 0.395    | -0.075 |
| ChCl :1,4-Butanediol                                 | 1:3   | 0.44  | 0.395    | 0.045  |
| ChCl :1,4-Butanediol                                 | 1:4   | 0.42  | 0.395    | 0.025  |
| ChCl :1,4-Butanediol                                 | 1:5   | 0.40  | 0.395    | 0.005  |
| ChCl :1,4-Butanediol                                 | 1:6   | 0.33  | 0.390    | -0.060 |
| ChCl : Phenol                                        | 1:2   | 0.23  | 0.273    | -0.043 |
| ChCl : Phenol                                        | 1:3   | 0.28  | 0.260    | 0.020  |
| ChCl : Phenol                                        | 1:4   | 0.48  | 0.260    | 0.220  |
| ChCl : Phenol                                        | 1:5   | 0.47  | 0.280    | 0.190  |
| ChCl : Phenol                                        | 1:6   | 0.49  | 0.270    | 0.220  |
| ChCl : o-Cresol                                      | 1:2   | 0.41  | 0.293    | 0.118  |
| ChCl : o-Cresol                                      | 1:3   | 0.49  | 0.295    | 0.195  |
| ChCl : o-Cresol                                      | 1:4   | 0.49  | 0.270    | 0.220  |
| ChCl : o-Cresol                                      | 1:5   | 0.49  | 0.258    | 0.233  |
| ChCl : o-Cresol                                      | 1:6   | 0.49  | 0.275    | 0.215  |
| Betaine : Lactic acid : H <sub>2</sub> O             | 1:2:2 | 0.566 | 0.275    | 0.291  |
| Histidine : Lactic acid : H <sub>2</sub> O           | 1:9:7 | 0.41  | 0.285    | 0.125  |
| Betaine : DL-Malic Acid : H <sub>2</sub> O           | 2:1:3 | 0.616 | 0.229    | 0.388  |
| ChCl : Fructose:H <sub>2</sub> O                     | 1:1:1 | 0.46  | 0.320    | 0.140  |
| ChCl : Xylitol                                       | 1:1   | 0.58  | 0.350    | 0.230  |
| ChCl : Triethylene glycol                            | 1:3   | 0.313 | 0.350    | -0.037 |
| ChCl : Triethylene glycol                            | 1:4   | 0.21  | 0.380    | -0.170 |
| ChCl : Triethylene glycol                            | 1:5   | 0.474 | 0.390    | 0.084  |
| ChCl : Triethylene glycol                            | 1:6   | 0.49  | 0.400    | 0.090  |
| N,N-diethylethanolammonium chloride : Glycerol       | 1:2   | 0.54  | 0.335    | 0.205  |
| N,N-diethylethanolammonium chloride: Ethylene glycol | 1:2   | 0.28  | 0.395    | -0.115 |
| ChCl : Glycolic acid                                 | 1:1   | 0.86  | 0.355    | 0.505  |
| ChCl : Levulinic acid                                | 1:2   | 0.85  | 0.390    | 0.460  |
| ChCl : Levulinic acid                                | 1:3   | 0.90  | 0.400    | 0.500  |
| Tetraethylammonium chloride : Levulinic acid         | 1:3   | 0.76  | 0.435    | 0.325  |
| Trimethylamine hydrochloride : Levulinic acid        | 1:3   | 0.81  | 0.405    | 0.405  |

$E = E_m - E_{re}$ ,  $E_m$  is the measured potential in DES,  $E_{re}$  is the potential of internal reference.

**Table S3** Data of LIB dataset collected from previous work.

| DESs                                          | ratio                                    | L:S /g·g <sup>-1</sup>            | T range /°C | Time range /h | No. of data points | Ref. |
|-----------------------------------------------|------------------------------------------|-----------------------------------|-------------|---------------|--------------------|------|
| ChCl : Glycol                                 | 1:1, 1:1.5, 1:2, 1:4                     | 50                                | 120-200     | 1-20          | 54                 | 1    |
| ChCl : EG                                     | 1:2, 1:3, 1:4                            | 89.4 , 50                         | 25-190      | 1-72          | 68                 | 2,3  |
| ChCl : Urea                                   | 1:2                                      | 50                                | 150-180     | 1-24          | 70                 | 4    |
| ChCl : Oxalic acid                            | 1:1                                      | 50 , 150                          | 30-110      | 0.083-8       | 87                 | 5,6  |
| PTSA·H <sub>2</sub> O : ChCl:H <sub>2</sub> O | 1:1:0, 1:1:2, 1:1:4,<br>1:1:6            | 37.85, 19.23, 9.61,<br>3.83, 2.39 | 50-120      | 0.083-2.5     | 25                 | 7    |
| ChCl : L-ascorbic acid:H <sub>2</sub> O       | 2:1:0, 2:1:2, 2:1:4,<br>2:1:6            | 25                                | 30-70       | 0.25-1.5      | 25                 | 8    |
| ChCl : PTSA                                   | 1:1                                      | 60.54                             | 25-150      | 6-72          | 13                 | 9    |
| ChCl : Malonic acid                           | 1:1                                      | 60.54                             | 25-150      | 6-72          | 13                 | 9    |
| ChCl : Formic acid                            | 1:2                                      | 50                                | 30-90       | 12            | 7                  | 10   |
| ChCl : acetic acid                            | 1:2                                      | 50                                | 30-90       | 12            | 7                  | 10   |
| ChCl : propionic acid                         | 1:2                                      | 50                                | 30-90       | 12            | 7                  | 10   |
| ChCl : n-butyric acid                         | 1:2                                      | 50                                | 30-90       | 12            | 7                  | 10   |
| ChCl : Formic acid : H <sub>2</sub> O         | 1:2:1.4, 1:2:3.2,<br>1:2:5.5,<br>1:2:8.6 | 50                                | 60-100      | 0.083-0.5     | 18                 | 11   |
| ChCl : L-(+)-tartaric acid:H <sub>2</sub> O   | 1:1:0, 1:1:1.1, 1:1:2.2,<br>1:1:3.3      | 27.78, 38.46, 40,<br>50, 66.67    | 70          | 0.25-21       | 28                 | 12   |
| ChCl : succinic acid : EG                     | 1:1:1                                    | 300                               | 90-150      | 0.5-16        | 36                 | 13   |
| EG : sulfosalicylic acid dihydrate            | 8:1, 12:1, 10:1                          | 10, 15, 17.14, 20,<br>24, 30      | 70-110      | 2-12          | 34                 | 14   |
| EG : monohydrate citric acid                  | 1:1, 1.5:1, 2:1, 2.5:1,<br>3:1, 3.5:1    | 84                                | 70-100      | 1-12          | 58                 | 15   |
| PEG200 : PTSA·H <sub>2</sub> O                | 1:1                                      | 50                                | 25-120      | 0.17-96       | 10                 | 16   |
| Guanidine hydrochloride : lactic acid         | 1:2                                      | 50                                | 25-80       | 0.5-24        | 17                 | 17   |

**Table S4** Data of MO dataset collected from previous work.

| DESS                          | ratio         | L:S   | T range /°C | Time /h | MO                                                                     | No. Of data points | Ref. |
|-------------------------------|---------------|-------|-------------|---------|------------------------------------------------------------------------|--------------------|------|
| ChCl:                         | 7:3, 3:7,     | 25    | 60-100      | 0.083-5 | CuO, ZnO, CoO,                                                         | 92                 | 18   |
| Sulphosalicylic acid          | 1:1, 4:1      |       |             |         | Fe <sub>2</sub> O <sub>3</sub>                                         |                    |      |
| ChCl:EG                       | 1:2           | 30,50 | 50          | 1-72    | FeO, Fe <sub>3</sub> O <sub>4</sub> ,                                  | 26                 | 19   |
|                               |               |       |             |         | CoO, Cu <sub>2</sub> O,                                                |                    |      |
|                               |               |       |             |         | CuO, MnO                                                               |                    |      |
| ChCl:oxalic 2H <sub>2</sub> O | 1:1           | 30    | 50          | 1-72    | MnO, Fe <sub>2</sub> O <sub>3</sub> , Fe <sub>3</sub> O <sub>4</sub> , | 20                 | 19   |
|                               |               |       |             |         | CoO,                                                                   |                    |      |
|                               |               |       |             |         | CuO, Cu <sub>2</sub> O,                                                |                    |      |
|                               |               |       |             |         | ZnO, PbO                                                               |                    |      |
| ChCl:Levinulic acid           | 1:2           | 30    | 50          | 1-72    | CoO, MnO                                                               | 12                 | 19   |
| ChCl:PTSA                     | 1:2, 2:1, 1:1 | 20    | 50          | 24      | MnO, Fe <sub>2</sub> O <sub>3</sub> ,                                  | 18                 | 20   |
|                               |               |       |             |         | Fe <sub>3</sub> O <sub>4</sub> , CuO                                   |                    |      |
|                               |               |       |             |         | Cu <sub>2</sub> O, ZnO                                                 |                    |      |
| ChCl:malonic acid             | 1:1           | 50    | 50          | 48      | MnO, FeO, Fe <sub>3</sub> O <sub>4</sub> ,                             | 7                  | 21   |
|                               |               |       |             |         | CoO,                                                                   |                    |      |
|                               |               |       |             |         | CuO, Cu <sub>2</sub> O,                                                |                    |      |
|                               |               |       |             |         | ZnO,                                                                   |                    |      |
| TEAB:CAA                      | 1:2           | 20    | 50          | 24      | Fe <sub>3</sub> O <sub>4</sub> , CuO, ZnO,                             | 4                  | 22   |
|                               |               |       |             |         | PbO                                                                    |                    |      |
| TPAB:CAA                      | 1:2           | 20    | 50          | 24      | Fe <sub>3</sub> O <sub>4</sub> , CuO, ZnO,                             | 4                  | 22   |
|                               |               |       |             |         | PbO                                                                    |                    |      |
| TBAB:CAA                      | 1:1, 1:2      | 20    | 50          | 24      | Fe <sub>3</sub> O <sub>4</sub> , CuO, ZnO,                             | 8                  | 22   |
|                               |               |       |             |         | PbO                                                                    |                    |      |
| TBAHS:CAA                     | 1:1, 1:2      | 20    | 50          | 24      | Fe <sub>3</sub> O <sub>4</sub> , CuO, ZnO,                             | 8                  | 22   |
|                               |               |       |             |         | PbO                                                                    |                    |      |

**Table S5** The ranges of the grid-search for each algorithm in training the models

| Algorithm                 | Hyperparameter   | Range                        |
|---------------------------|------------------|------------------------------|
| Support Vector Regression | C                | 0.1,0.2,0.3,0.5, 1,2,3,10,20 |
|                           | gamma            | 1, 0.1, 0.01,0.001           |
| Random Forest             | n_estimators     | 5,10,20,50,70,80,100         |
|                           | max_depth        | 2,3,5,7,9,10,20              |
|                           | max_features     | 0.6,0.7,1                    |
| Extreme Gradient boosting | n_estimators     | 5, 10, 20, 50, 70, 100, 200  |
|                           | max_depth        | 5, 6, 7, 8, 9, 10            |
|                           | max_delta_step   | 1, 3, 5, 7                   |
|                           | subsample        | 0.4, 0.6, 0.8, 1             |
|                           | colsample_bytree | 0.5, 0.7, 0.9                |

**Table S6** Prediction results on the training set for the four model inputs with different feature groups.

| Feature group | model   | R <sup>2</sup> | MSE    |
|---------------|---------|----------------|--------|
| 0             | SVR     | 0.6759         | 0.0057 |
|               | RForest | 0.9935         | 0.0001 |
|               | XGBoost | 0.9938         | 0.0001 |
|               | NN      | 0.8184         | 0.0032 |
| 1             | SVR     | 0.6918         | 0.0054 |
|               | RForest | 0.9948         | 0.0001 |
|               | XGBoost | 0.9939         | 0.0001 |
|               | NN      | 0.9869         | 0.0002 |
| 2             | SVR     | 0.6954         | 0.0053 |
|               | RForest | 0.9596         | 0.0007 |
|               | XGBoost | 0.9609         | 0.0007 |
|               | NN      | 0.9004         | 0.0017 |
| 3             | SVR     | 0.7020         | 0.0025 |
|               | RForest | 0.9598         | 0.0007 |
|               | XGBoost | 0.9611         | 0.0007 |
|               | NN      | 0.9333         | 0.0012 |
| 4             | SVR     | 0.7318         | 0.0047 |
|               | RForest | 0.8910         | 0.0019 |
|               | XGBoost | 0.8939         | 0.0019 |
|               | NN      | 0.8842         | 0.0020 |

**Table S7** The performance of different feature sets on the XGBoost model.

| Feature set             |       | R <sup>2</sup> | MSE    |
|-------------------------|-------|----------------|--------|
| The optimal feature set | train | 0.9779         | 0.0005 |
|                         | test  | 0.9072         | 0.0038 |
| Without pKa of HBD      | train | 0.9702         | 0.0008 |
|                         | test  | 0.8607         | 0.0032 |
| Without log $\beta$     | train | 0.9842         | 0.0004 |
|                         | test  | 0.8499         | 0.0035 |
| Without energy          | train | 0.9692         | 0.0008 |
|                         | test  | 0.8721         | 0.0030 |

The optimal feature set includes L:S, log $\beta$ , energy, temperature, time, pKa of HBD, water content, MW-HBD, MW-HBA, and number of O.

**Table S8** Experimental values of Co solubility and std deviations of LCO leaching experiments in different DESs predicted by the CGAN model.

| DES                                             | Co-1<br>(mg/g) | Co-2<br>(mg/g) | Co-3<br>(mg/g) | Average values of Co<br>solubility (mg/g) | Std deviation |
|-------------------------------------------------|----------------|----------------|----------------|-------------------------------------------|---------------|
| 1ChCl:1Glutaric acid                            | 16.08          | 15.64          | 16.08          | 15.93                                     | 0.254         |
| ChCl:1Glycolic acid                             | 16.12          | 15.81          | 15.79          | 15.91                                     | 0.185         |
| ChCl:3Levulinic acid                            | 14.9           | 14.5           | 14.87          | 14.76                                     | 0.223         |
| Trimethylamine<br>hydrochloride:3Levulinic_acid | 13.61          | 12.99          | 13.14          | 13.25                                     | 0.323         |
| ChCl:6 O-cresol                                 | 0.32           | 0.24           | 0.23           | 0.26                                      | 0.048         |

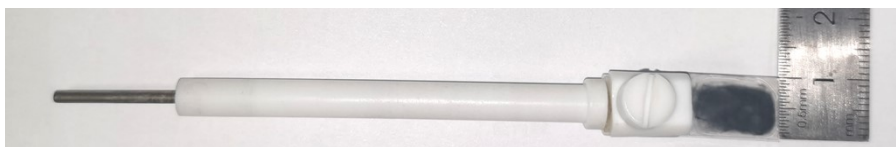

**Fig. S1** The photo of the working electrode used in electrochemical experiments.

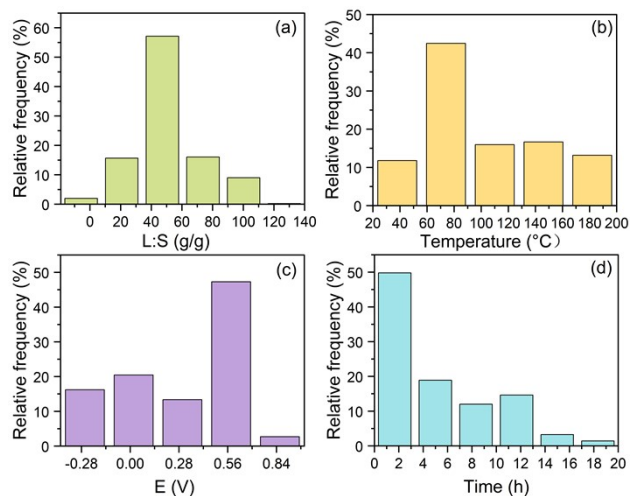

Fig. S2 The distribution of the inputs, (a)the ratio of liquid to solid, L:S, (b)leaching temperature, (c)E(reaction potential), (d)leaching time.

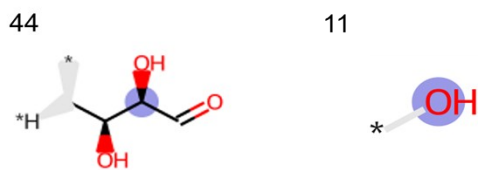

Fig. S3 Structure 44 and structure 11 are obtained by the Morgan fingerprint.

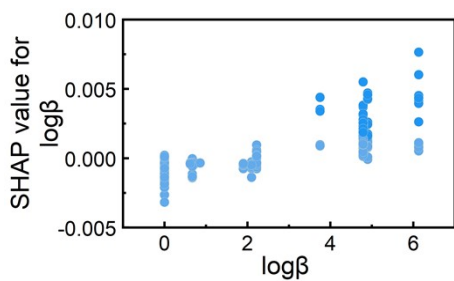

Fig. S4 The dependence plots of SHAP values with  $\log\beta$ .



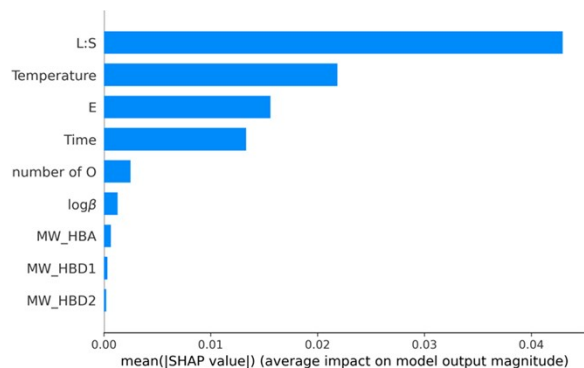

**Fig.S5** The Bar chart of mean importance of different feature

## Referenc

e

1. H. Yu, S. Wang, Y. Li, Q. Qiao, K. Wang and X. Li, *Green Process. Synth.*, 2022, **11**, 868-874.
2. N. Peeters, K. Janssens, D. de Vos, K. Binnemans and S. Riaño, *Green Chem.*, 2022, **24**, 6685-6695.
3. K. Wang, T. Hu, P. Shi, Y. Min, J. Wu and Q. Xu, *ACS Sustain. Chem. Eng.*, 2022, **10**, 1149-1159.
4. S. Wang, Z. Zhang, Z. Lu and Z. Xu, *Green Chem.*, 2020, **22**, 4473-4482.
5. Q. Lu, L. Chen, X. Li, Y. Chao, J. Sun, H. Ji and W. Zhu, *ACS Sustain. Chem. Eng.*, 2021, **9**, 13851-13861.
6. T. Li, Y. Xiong, X. Yan, T. Hu, S. Jing, Z. Wang and X. Ge, *J. Energy Chem.*, 2022, **72**, 532-538.
7. M. J. Roldan-Ruiz, M. L. Ferrer, M. C. Gutierrez and F. del Monte, *ACS Sustain. Chem. Eng.*, 2020, **8**, 5437-5445.
8. Y. Hua, Y. Sun, F. Yan, S. Wang, Z. Xu, B. Zhao and Z. Zhang, *Chem. Eng. J.*, 2022, **436**, 133200.
9. B. Lu, R. Du, G. Wang, Y. Wang, S. Dong, D. Zhou, S. Wang and C. Li, *Environ. Res.*, 2022, **212**, 113286.
10. L. L. Chen, Y. H. Chao, X. W. Li, G. L. Zhou, Q. Q. Lu, M. Q. Hua, H. P. Li, X. G. Ni, P. W. Wu and W. S. Zhu, *Green Chem.*, 2021, **23**, 2177-2184.
11. M. Liu, W. Ma, X. Zhang, Z. Liang and Q. Zhao, *Mater. Chem. Phys.*, 2022, **289**, 126466.
12. C. Ma, M. Svård and K. Forsberg, *Resources, Conservation and Recycling*, 2022, **186**, 106579.
13. F. Huang, T. Li, X. Yan, Y. Xiong, X. Zhang, S. Lu, N. An, W. Huang, Q. Guo and X. Ge, *ACS Omega*, 2022, **7**, 11452-11459.
14. S. Tang, M. Zhang and M. Guo, *ACS Sustain. Chem. Eng.*, 2022, **10**, 975-985.
15. G. Zeng, J. Yao, C. Liu, X. Luo, H. Ji, X. Mi and C. Deng, *ACS Sustain. Chem. Eng.*, 2021, **9**, 16133-16142.
16. Y. Chen, Y. Wang, Y. Bai, Y. Duan, B. Zhang, C. Liu, X. Sun, M. Feng and T. Mu, *ACS Sustain. Chem. Eng.*, 2021, **9**, 12940-12948.
17. Y. Tian, W. Chen, B. Zhang, Y. Chen, R. Shi, S. Liu, Z. Zhang and T. Mu, *ChemSusChem*, 2022, **15**, e202200524.
18. I. V. Zinov'eva, A. Y. Fedorov, N. A. Milevskii, Y. A. Zakhodyaeva and A. A. Voshkin, *Theor. Found. Chem. Eng.*, 2021, **55**, 371-379.
19. I. M. Pateli, D. Thompson, S. S. M. Alabdullah, A. P. Abbott, G. R. T. Jenkin and J. M. Hartley, *Green Chem.*, 2020, **22**, 5476-5486.
20. N. R. Rodriguez, L. Machiels and K. Binnemans, *ACS Sustain. Chem. Eng.*, 2019, **7**, 3940-3948.
21. A. P. Abbott, G. Capper, D. L. Davies, K. J. McKenzie and S. U. Obi, *J. Chem. Eng. Data*, 2006, **51**, 1280-1282.
22. K. A. Omar and R. Sadeghi, *J. Mol. Liq.*, 2022, **347**.
